# Supplementary material for: Adoptively transferred TRAIL+ T cells suppress GVHD and augment antitumor activity
Source: JCI journal article supplement (doi:10.1172/jci66301), 2013-05-14

**LEGENDS OF SUPPLEMENTARY FIGURES**

**Suppl Figure 1. (A)** Expression of cytolytic molecules on transduced T cells showing no difference between GFP<sup>+</sup> and TRAIL<sup>+</sup>T cells. **(B, C)** B6→CBF1+LB27.4 allo-BMT is described in Figure 1. **(B)** Necropsy was performed on animals found dead during survival monitoring and the cause of death tabulated. **(C)** Weekly GVHD clinical scores. (\*\*\*) p<0.001).

**Suppl Figure 2.** Recipients of BALB/c→BALB/c syn-BMT were adoptively transferred with 5x10<sup>6</sup>/recipient B6 allo-preT cells. Spleen and thymus were harvested on **(A)** Day 14 and **(B)** Day 28 and the number of preT-derived cells calculated. **(C)** Percentage frequency of preT-derived splenic CD4 and CD8 T cells at day 28 were determined.

**Suppl Figure 3. (A, B)** B6→CBF1 allo-BMT is described in Figure 1A, B, C, D. Weekly weight changes as an indicator of GVHD was monitored. **(C)**. B6→CBF1 allo-BMT were left either untreated or adoptively transferred with donor GFP<sup>+</sup> and TRAIL<sup>+</sup>T cells, and subsequently inoculated with LCMV. Splenocytes from the inoculated recipients were harvested and cocultured with vero cells to determine PFU/mg (\*p<0.05, \*\*\*p<0.001).

**Suppl Figure 4.** PBMCs from CLL patients – CLL-1 and CLL-2 – were analyzed by flow cytometry. **(A)** DAPI<sup>+</sup>excluded live events are studied for expression of

CD19 and CD5, showing 56% and 60% putative CLL cells. **(B)** DAPI<sup>+</sup>excluded live events are studied for expression of DR4 and DR5.

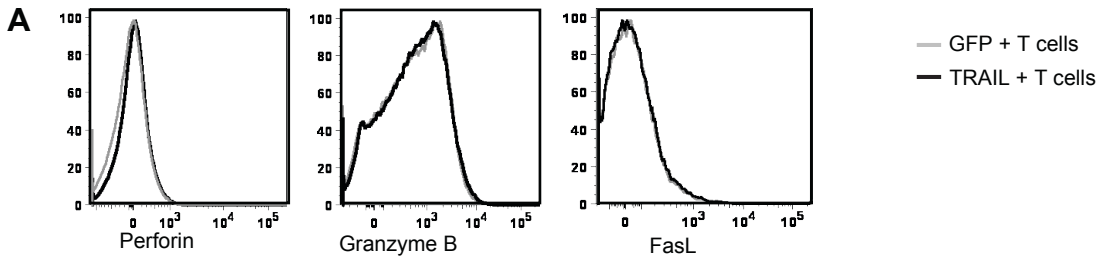

**B**

Tumor dose:  $2 \times 10^5$ /rcpt. T cell dose:  $0.5 \times 10^6$ /rcpt

|   |                             | Tumor | GVHD | Alive |
|---|-----------------------------|-------|------|-------|
| □ | B6 BMT                      | 0     | 0    | 10    |
| ■ | B6 BMT+LB27.4               | 10    | 0    | 0     |
| ◇ | +GFP <sup>+</sup> T cells   | 2     | 4    | 4     |
| ◆ | +TRAIL <sup>+</sup> T cells | 0     | 0    | 10    |

Tumor dose:  $1 \times 10^6$ /rcpt. T cell dose:  $1 \times 10^6$ /rcpt

|   |                             | Tumor | GVHD | Alive |
|---|-----------------------------|-------|------|-------|
| ■ | B6 BMT+LB27.4               | 9     | 0    | 1     |
| ◇ | +GFP <sup>+</sup> T cells   | 1     | 9    | 0     |
| ◆ | +TRAIL <sup>+</sup> T cells | 0     | 0    | 10    |

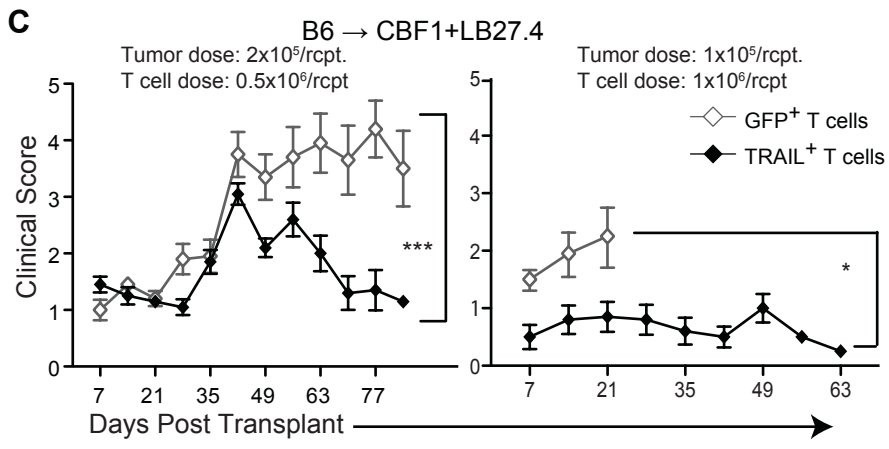

suppl Figure 1

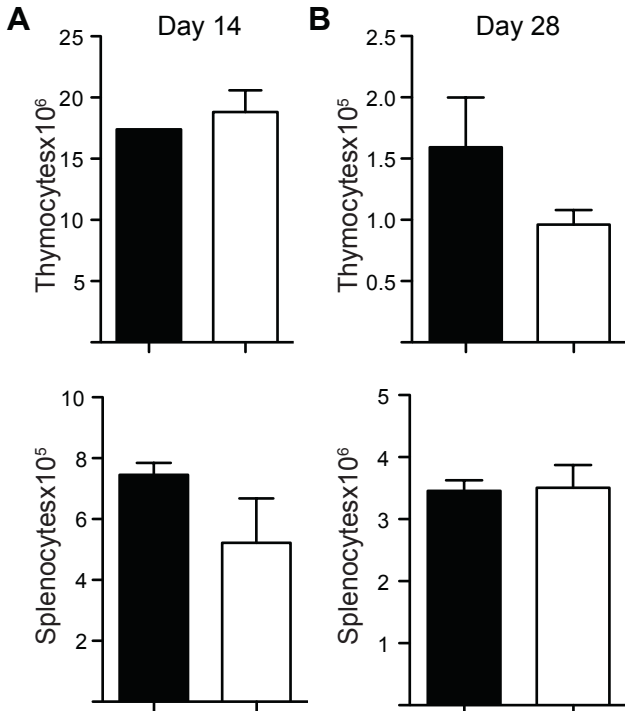

B6 preT cells + BALB/c → BALB/c

- GFP<sup>+</sup> preT cell-derived
- TRAIL<sup>+</sup> preT cell-derived

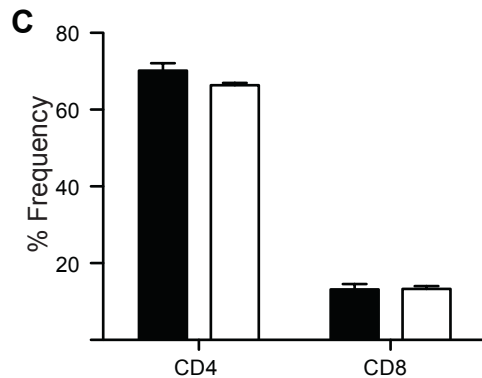

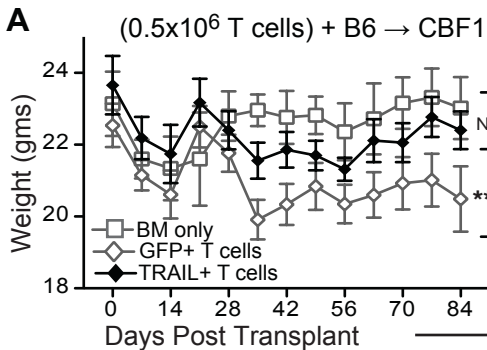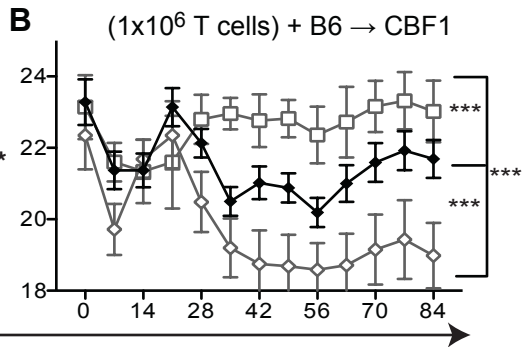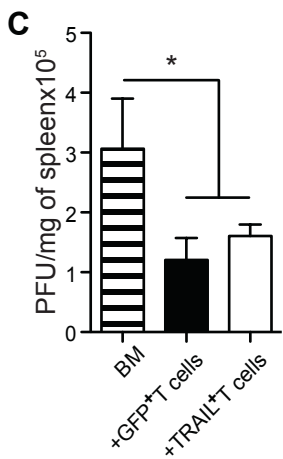

suppl Figure 3

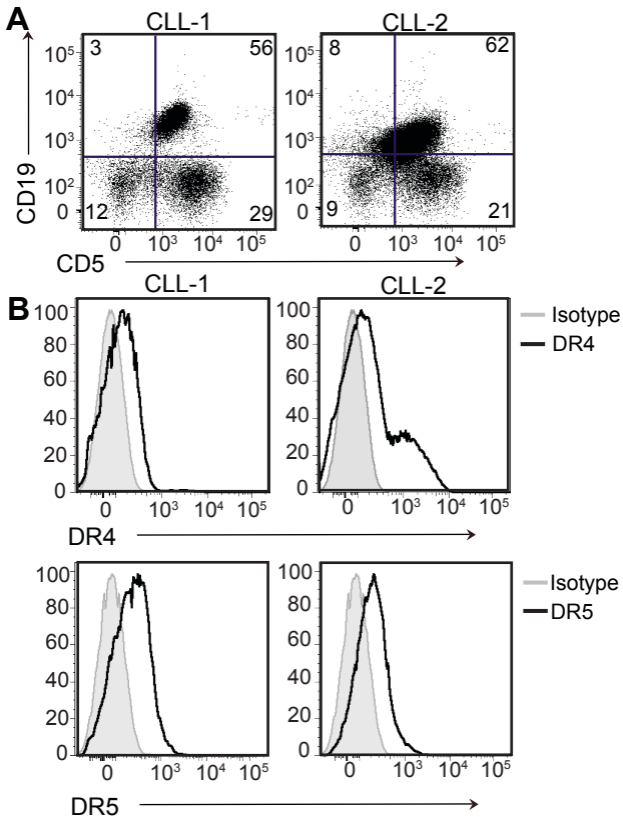

Supplement: sd1 [file 1]
